# Supplementary material for: Observed Impacts of Aerosol Regimes on Energy and Carbon Fluxes in the Amazon Forest
Source: Copernicus journal article supplement (doi:10.5194/egusphere-2025-4278), 2025-09-15
Supplement: Supplementary file [file egusphere-2025-4278-AC2-supplement.pdf]

1 **Title: Observed Impacts of Aerosol Regimes on Energy and Carbon Fluxes in the**  
2 **Amazon Forest**

3  
4 Response (blue color) to anonymous Referee #1 (black). The original manuscript was  
5 changed accordingly. The lines indicated in our answers correspond to the track  
6 version of the manuscript.

7  
8  
9 **General comment**

10  
11 The manuscript investigates how contrasting aerosol optical depth (AOD) regimes  
12 affect surface energy and carbon fluxes over an undisturbed Amazon rainforest using  
13 long-term in situ data (2016–2022) from the Amazon Tall Tower Observatory (ATTO).  
14 The authors focus on differences between “clean” (AOD < 0.13) and “polluted” (AOD  
15 > 0.40) regimes and assess impacts on radiation, sensible and latent heat fluxes, and  
16 CO<sub>2</sub> exchange. The topic is highly relevant to ACP because it addresses aerosol–  
17 biosphere–atmosphere interactions in one of the planet’s key ecosystems. The study  
18 provides new observational insights from a unique long-term dataset and uses  
19 appropriate statistical tools (Spearman correlation, Pillai’s trace, Random Forest) to  
20 assess nonlinear relationships. I think the paper is well written and it is neatly exposed.  
21 The literature cited is adequate.

22  
23 We would like to thank Referee #1 for their detailed review of our manuscript and for  
24 the positive feedback. We are also grateful for the valuable contributions that helped  
25 to clarify the text and refine the analyses.

26  
27 The manuscript presents an interesting empirical analysis of aerosol effects on energy  
28 and carbon fluxes in the Amazon. However, the methodology lacks quantitative  
29 robustness in (i) defining aerosol pollution regimes and in assessing statistical  
30 significance of differences between them and improved discussion. The structure and  
31 figures are generally clear, but the (ii) discussion often repeats background concepts  
32 and lacks a mechanistic synthesis connecting radiation, energy partitioning, and  
33 ecosystem carbon exchange.

34  
35 We thank the Reviewer #1 for these important comments. They will certainly help to  
36 improve the methodology and discussion of the results.

37  
38 We would like to begin our responses by stating that in the new version of the  
39 manuscript, we regrouped our data in a way that allowed us to include a greater  
40 number of runs (half-hour periods). In the previous version of the manuscript, in  
41 addition to excluding all periods when clouds were present, which is very common in  
42 the Amazon, we also excluded all data from a given day and time when a variable was  
43 missing. For example, if we did not have the reflected shortwave radiation  
44 measurement for a given time, we removed all other variables for that same time. This  
45 resulted in only 523 valid half-hour periods (370 dry season, 153 wet). In the new  
46 version of the Manuscript, we decided to regroup the variables so that they did not  
47 depend on each other. We first identified the periods in which we had the Clean and  
48 Polluted regimes (AOD < 0.13 and AOD > 0.40) and then identified how many runs of

each variable were available for each regime. After this procedure, the number of runs increased substantially, as shown in Table R1, comparison between the dataset used in the first version of the manuscript (single database) and the dataset used for this new version (database by variable).

Table R1: Number of runs (half-hour periods) after all quality controls mentioned in section 2.2.

| Variables                                               | Single database |              |                 |              |       | Database by variable |              |                 |              |            |
|---------------------------------------------------------|-----------------|--------------|-----------------|--------------|-------|----------------------|--------------|-----------------|--------------|------------|
|                                                         | 10:00 -14:00 LT |              | 07:00 -17:00 LT |              | Total | 10:00 -14:00 LT      |              | 07:00 -17:00 LT |              | Total      |
|                                                         | No. Clean       | No. Polluted | No. Clean       | No. Polluted |       | No. Clean            | No. Polluted | No. Clean       | No. Polluted | No. Sample |
| SWin(Wm <sup>-2</sup> )                                 | 98              | 81           | 219             | 151          | 370   | 301                  | 204          | 736             | 459          | 1195       |
| SWout(Wm <sup>-2</sup> )                                | 98              | 81           | 219             | 151          | 370   | 301                  | 204          | 736             | 459          | 1195       |
| LWatm(Wm <sup>-2</sup> )                                | 98              | 81           | 219             | 151          | 370   | 301                  | 200          | 733             | 453          | 1186       |
| LWterr(Wm <sup>-2</sup> )                               | 98              | 81           | 219             | 151          | 370   | 301                  | 204          | 735             | 459          | 1194       |
| Rn(Wm <sup>-2</sup> )                                   | 98              | 81           | 219             | 151          | 370   | 301                  | 200          | 733             | 453          | 1186       |
| H(Wm <sup>-2</sup> )                                    | 98              | 81           | 219             | 151          | 370   | 197                  | 192          | 455             | 389          | 844        |
| LE(Wm <sup>-2</sup> )                                   | 98              | 81           | 219             | 151          | 370   | 183                  | 180          | 447             | 386          | 833        |
| FCO <sub>2</sub> (μmolm <sup>-2</sup> s <sup>-1</sup> ) | 98              | 81           | 219             | 151          | 370   | 247                  | 195          | 596             | 405          | 1001       |
| G(Wm <sup>-2</sup> )                                    | 98              | 81           | 219             | 151          | 370   | 301                  | 218          | 741             | 487          | 1228       |

In the new version of the manuscript, we rewrote L107:

*“After filtering, the resulting dataset is summarized in Table S1 and S2.”*

(i) In the previous version of the manuscript the classification into “Clean” and “Polluted” regimes was based on the 10th and 90th percentiles of the AOD distribution at ATTO. However, following the reviewer's recommendation, we performed a sensitivity analysis by applying the statistical test using three percentile thresholds (10th/90th, 15th/85th, and 20th/80th) to quantitatively assess the robustness of the regime separation (Table R2). The results show that the 10th/90th and 15th/85th percentile thresholds provide stronger physical contrasts between aerosol regimes, expressed as larger differences in median values of key variables, and are associated with statistically significant differences. Conversely, the 20th/80th threshold leads to a loss of statistical significance for several variables, indicating a dilution of the physical contrast between regimes. Based on these tests, the threshold was maintained to the 10th/90th percentiles, as this choice preserves physically meaningful differences between aerosol regimes.

Table R2. Results of the statistical test comparing all analyzed variables between clean and polluted aerosol regimes for three AOD thresholds. Panels correspond to: 10th–90th percentiles (top), 15th–85th percentiles (middle), and 20th–80th percentiles (bottom).

| Main Stage - Percentil 10 (AOD≤0.13), Percentil 90 (AOD≥0.40) |         |            |          |            |               |             |             |         |              |
|---------------------------------------------------------------|---------|------------|----------|------------|---------------|-------------|-------------|---------|--------------|
| Variable                                                      | N Clean | Mean Clean | SD Clean | N Polluted | Mean Polluted | SD Polluted | U Statistic | p-value | Significance |
| SWin(Wm <sup>-2</sup> )                                       | 301     | 836.5      | 165.2    | 204        | 813.5         | 124.4       | 35391       | 0.004   | **           |
| SWout(Wm <sup>-2</sup> )                                      | 301     | 92.8       | 19.7     | 204        | 95.9          | 15.1        | 27859       | 0.077   | ns           |
| LWatm(Wm <sup>-2</sup> )                                      | 301     | 431.5      | 10.4     | 200        | 432.1         | 9.4         | 29439       | 0.677   | ns           |
| LWterr(Wm <sup>-2</sup> )                                     | 301     | 484.7      | 14.0     | 204        | 483.6         | 10.8        | 34148       | 0.032   | *            |
| Rn(Wm <sup>-2</sup> )                                         | 301     | 659.3      | 137.8    | 200        | 632.8         | 100.8       | 35671       | 0.000   | ***          |
| H(Wm <sup>-2</sup> )                                          | 197     | 160.6      | 67.8     | 192        | 138.9         | 61.4        | 22611       | 0.001   | ***          |
| LE(Wm <sup>-2</sup> )                                         | 183     | 426.7      | 136.8    | 180        | 417.8         | 146.7       | 17246       | 0.438   | ns           |
| FCO <sub>2</sub> (μmolm <sup>-2</sup> s <sup>-1</sup> )       | 247     | -12.5      | 8.0      | 195        | -17.4         | 8.6         | 32125       | 0.000   | ***          |
| G(Wm <sup>-2</sup> )                                          | 301     | 1.8        | 1.6      | 218        | 0.8           | 1.4         | 43719       | 0.000   | ***          |

| Wide Stage - Percentil 15 (AOD≤0.14), Percentil 85 (AOD≥0.36) |         |            |          |            |               |             |             |         |              |
|---------------------------------------------------------------|---------|------------|----------|------------|---------------|-------------|-------------|---------|--------------|
| Variable                                                      | N Clean | Mean Clean | SD Clean | N Polluted | Mean Polluted | SD Polluted | U Statistic | p-value | Significance |
| SWin(Wm <sup>-2</sup> )                                       | 423     | 829.1      | 166.2    | 272        | 816.6         | 131.5       | 62510       | 0.054   | ns           |
| SWout(Wm <sup>-2</sup> )                                      | 423     | 91.8       | 20.1     | 272        | 95.7          | 15.6        | 50534       | 0.007   | **           |
| LWatm(Wm <sup>-2</sup> )                                      | 423     | 432.7      | 10.0     | 268        | 433.2         | 9.4         | 55655       | 0.688   | ns           |
| LWterr(Wm <sup>-2</sup> )                                     | 423     | 484.1      | 14.5     | 272        | 484.5         | 11.0        | 59785       | 0.382   | ns           |
| Rn(Wm <sup>-2</sup> )                                         | 423     | 654.7      | 138.0    | 268        | 634.7         | 107.7       | 64197       | 0.003   | **           |
| H(Wm <sup>-2</sup> )                                          | 281     | 157.5      | 70.0     | 258        | 139.0         | 62.7        | 42045       | 0.001   | **           |
| LE(Wm <sup>-2</sup> )                                         | 265     | 422.3      | 133.9    | 241        | 419.8         | 145.7       | 32675       | 0.651   | ns           |
| FCO <sub>2</sub> (μmolm <sup>-2</sup> s <sup>-1</sup> )       | 354     | -12.6      | 8.2      | 263        | -16.7         | 8.5         | 60056       | 0.000   | ***          |
| G(Wm <sup>-2</sup> )                                          | 427     | 1.8        | 1.6      | 298        | 0.9           | 1.4         | 83989       | 0.000   | ***          |

| Alternative Stage - Percentil 20 (AOD≤0.16), Percentil 80 (AOD≥0.32) |         |            |          |            |               |             |             |         |              |
|----------------------------------------------------------------------|---------|------------|----------|------------|---------------|-------------|-------------|---------|--------------|
| Variable                                                             | N Clean | Mean Clean | SD Clean | N Polluted | Mean Polluted | SD Polluted | U Statistic | p-value | Significance |
| SWin(Wm <sup>-2</sup> )                                              | 547     | 822.9      | 172.0    | 372        | 828.2         | 132.4       | 103274      | 0.698   | ns           |
| SWout(Wm <sup>-2</sup> )                                             | 547     | 91.1       | 20.4     | 372        | 96.3          | 15.4        | 85935       | 0.000   | ***          |
| LWatm(Wm <sup>-2</sup> )                                             | 544     | 433.4      | 9.8      | 366        | 433.6         | 9.5         | 98174       | 0.723   | ns           |
| LWterr(Wm <sup>-2</sup> )                                            | 547     | 483.7      | 14.6     | 372        | 485.2         | 11.0        | 100283      | 0.712   | ns           |
| Rn(Wm <sup>-2</sup> )                                                | 544     | 650.5      | 144.8    | 366        | 644.3         | 112.1       | 105788      | 0.109   | ns           |
| H(Wm <sup>-2</sup> )                                                 | 377     | 155.9      | 71.0     | 350        | 140.8         | 64.5        | 74993       | 0.001   | **           |
| LE(Wm <sup>-2</sup> )                                                | 355     | 416.4      | 135.7    | 331        | 420.4         | 148.0       | 58402       | 0.893   | ns           |
| FCO <sub>2</sub> (μmolm <sup>-2</sup> s <sup>-1</sup> )              | 472     | -12.7      | 8.3      | 364        | -16.0         | 8.5         | 105109      | 0.000   | ***          |
| G(Wm <sup>-2</sup> )                                                 | 567     | 1.9        | 1.6      | 411        | 1.0           | 1.5         | 150612      | 0.000   | ***          |

We clarified this point in the revised manuscript as follows:

### Section 2.3:

L134-137: “Daily averages of AOD values were obtained to investigate seasonal variability. Our analysis distinguishes two contrasting atmospheric conditions at the ATTO site, defined as “Clean” and “Polluted” using AOD thresholds derived from the dry-season AOD distribution. The Clean and Polluted regimes correspond to the 10th (AOD ≤ 0.13) and 90th (AOD ≥ 0.40) percentiles, respectively. Further details on the seasonal aerosol analysis are provided in Section 3.1 and Table S3.”

### Section 3.1:

L201-207: “As the main goal of this work is to investigate the impact of aerosols on surface turbulent fluxes, the analysis focuses on data from the dry season. In addition, during the dry season there is more aerosol data since the could interference is much

less pronounced than during the wet season. Two aerosol regimes were defined based on percentile thresholds of the dry-season AOD distribution. Several percentile combinations were tested to assess the robustness of the regime separation. Based on this analysis, the 10th and 90th percentiles were selected to define the Clean ( $AOD \leq 0.13$ ) and Polluted ( $AOD \geq 0.40$ ) regimes, respectively, as they preserve physically meaningful differences between aerosol regimes (See table S1)."

(ii) In the new version of the manuscript, we improved the methodology by adding a statistical analysis for the definition of Clean and Polluted regimes. We also improved the discussion of the results to avoid repeating background concepts.

In its present form, I recommend **major revisions** according to my specific comments before the manuscript can be considered for publication in *ACP*.

### Specific comments

The study contributes observational evidence from a rare, pristine tropical forest site. The long-term dataset and the combination of aerosol and flux measurements are strengths. Nevertheless, the novelty is moderate, as the main conclusions - reduction of net radiation and turbulent fluxes under high AOD, accompanied by enhanced  $CO_2$  assimilation - are qualitatively consistent with previous literature (e.g., Cirino et al. 2014; Braghieri et al. 2020; Palacios et al. 2022). (i) The novelty would be strengthened by including a quantitative analysis of diffuse versus direct radiation, or by exploring seasonally resolved patterns rather than aggregating all data into two AOD categories. (ii) Defining "Clean" ( $AOD < 0.13$ ) and "Polluted" ( $AOD > 0.40$ ) purely from percentiles is arbitrary. Include a sensitivity test or physical rationale for these cutoffs. (iii) To increase the scientific value of the study, the authors should demonstrate, through appropriate statistical testing, whether the observed reductions ( $\approx 10\%$ ) are robust across years and not driven by interannual variability.

(i) We thank the reviewer for their valuable comment. Diffuse radiation (SWd) measurements are available only for the year 2021 for our experimental site. Prior to this period, SWd was not measured at the ATTO site, and in 2022 the sensor experienced technical issues that affected data quality. Nevertheless, to address the reviewer's suggestion, we quantified the diffuse radiation fraction ( $F_d = SW_d/SW_{in}$ ) for the available period (2021) and compared  $F_d$  between Clean and Polluted aerosol regimes. Our results indicate higher  $F_d$  values under Polluted regime compared to Clean regime (Figure R1). Specifically between 10:00 and 14:00 LT, the mean  $F_d$  values were 0.43 and 0.27 for Polluted and Clean regime, respectively, indicating an absolute difference of 0.16 between the two regimes ( $p < 0.05$ ). This is consistent with enhanced scattering of solar radiation associated with increased aerosol loading (Giorgi et al., 2002; Seinfeld and Pandis, 2016; Ezhova et al., 2018). Moreover, daytime  $CO_2$  fluxes showed a non-linear dependence on  $F_d$ , with net  $CO_2$  uptake increasing up to an  $F_d$  threshold ( $\approx 0.6$ ) and decreasing at higher  $F_d$  values (Figure R2). This behaviour was consistent with the response of NEE (net ecosystem exchange) for diffuse radiation reported by Deng et al. (2022) for four forest sites in China and aligns with the global-scale mechanisms proposed by Mercado et al. (2009).

These results provide observational support for the proposed mechanism linking aerosol loading, radiation partitioning, and ecosystem carbon exchange.

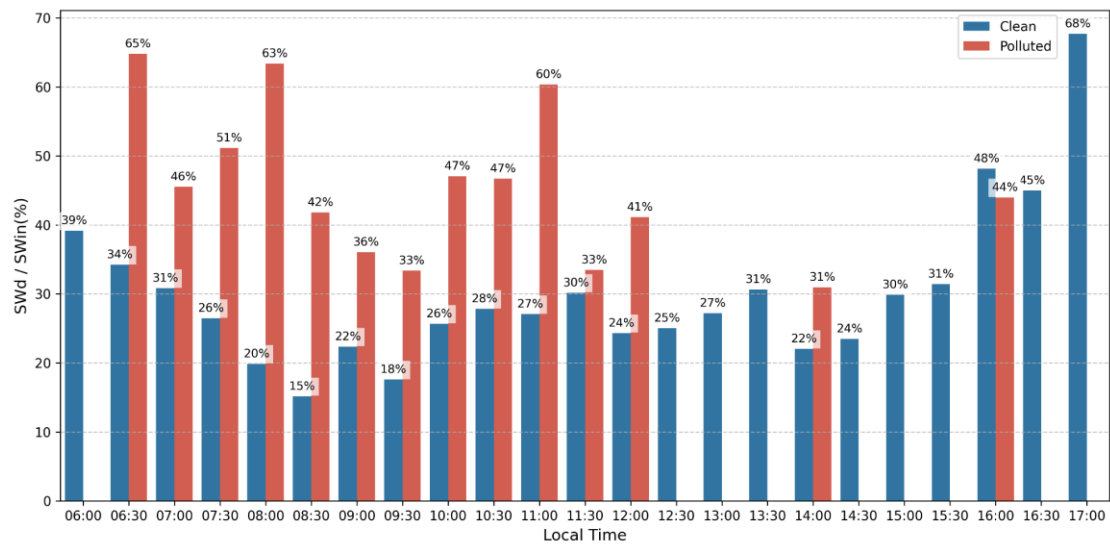

Figure R1. Diffuse radiation fraction ( $F_d = SW_d/SW_{in}$ ) under Clean and Polluted aerosol regimes during 2021.

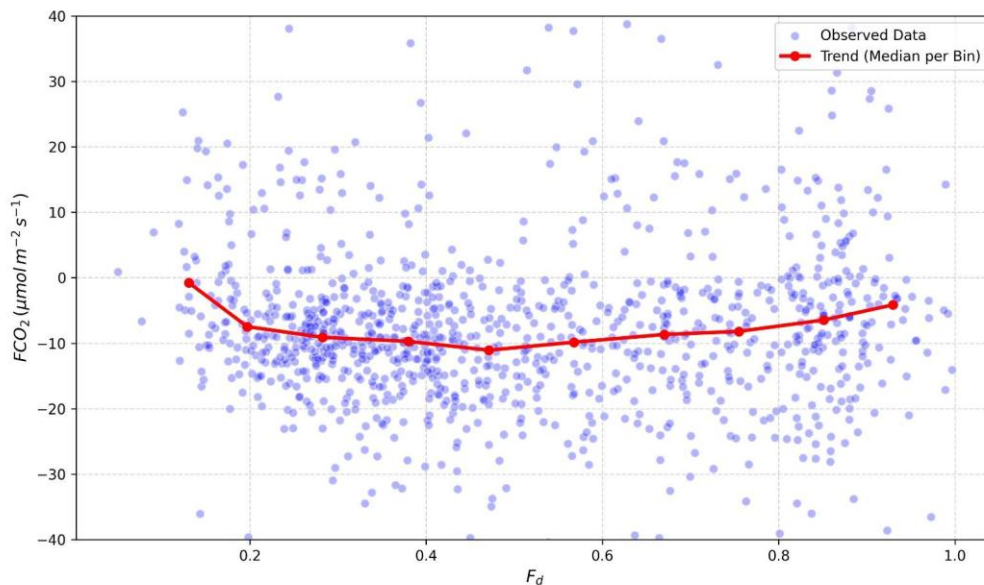

Figure R2. The relationship between  $CO_2$  flux and diffuse radiation fraction ( $F_d$ ) during 2021 at ATTO site.

The Methodology and Results sections have been updated in the new version of the manuscript as follows:

L87-90: “Additionally, diffuse shortwave radiation ( $SW_d$ ) was measured using a SPN1 Pyranometer (Delta-T Devices) installed at 75 m above ground level. However,  $SW_d$  data were available only for 2021, prior to this year,  $SW_d$  was not measured at the ATTO site, and data from 2022 were excluded due to technical issues with the sensor.”

L328-337: “We quantified the diffuse radiation fraction ( $F_d = SW_d/SW_{in}$ ) for the available period (2021) and compared  $F_d$  between Clean and Polluted aerosol regimes. Our results indicate higher  $F_d$  values under the Polluted regime compared to Clean regime (Figure S1). Specifically for the 10:00 and 14:00 LT interval, the mean  $F_d$  values were 0.43 and 0.27 for Polluted and Clean regime, respectively, indicating an absolute difference of 0.16 between the two regimes ( $p < 0.05$ ). This is consistent with enhanced scattering of solar radiation associated with increased aerosol loading (Giorgi et al., 2002; Seinfeld and Pandis, 2016; Ezhova et al., 2018). Moreover, daytime  $CO_2$  fluxes showed a non-linear dependence on  $F_d$ , with net  $CO_2$  uptake increasing up to an  $F_d$  threshold ( $\sim 0.6$ ) and decreasing at higher  $F_d$  values (Figure S2). This behaviour was consistent with the response of net ecosystem exchange for diffuse radiation reported by Deng et al. (2022) for four forest sites in China, and aligns with the global-scale mechanisms proposed by Mercado et al. (2009). These results provide observational support for the proposed mechanism linking aerosol loading, radiation partitioning, and ecosystem carbon exchange.”

(ii) We assessed the robustness of our results in relation to different regime thresholds as detailed in the General comment (L59-71 and Table R2 of this document).

(iii) We analyzed 2020 and 2022 separately due to higher data availability, while the remaining years (2016, 2017, 2018, 2019, and 2021), which had lower data availability, were grouped into a single category (Remaining). The pattern observed in the preliminary version of the manuscript (Figs. 5 and 6) was consistent across individual years (Figure R3). That is, under polluted conditions, reductions in  $SW_{in}$  lead to a decrease in  $R_n$ , followed by decreases in  $H$ ,  $LE$ ,  $G$ , and  $FCO_2$ .

The following sentence has been added to the revised manuscript.

L293: “The reductions in  $H$ ,  $LE$ ,  $G$ , and  $FCO_2$  shown in Fig. 6 and Fig. 7 were also observed across individual years (see Fig. S3).”



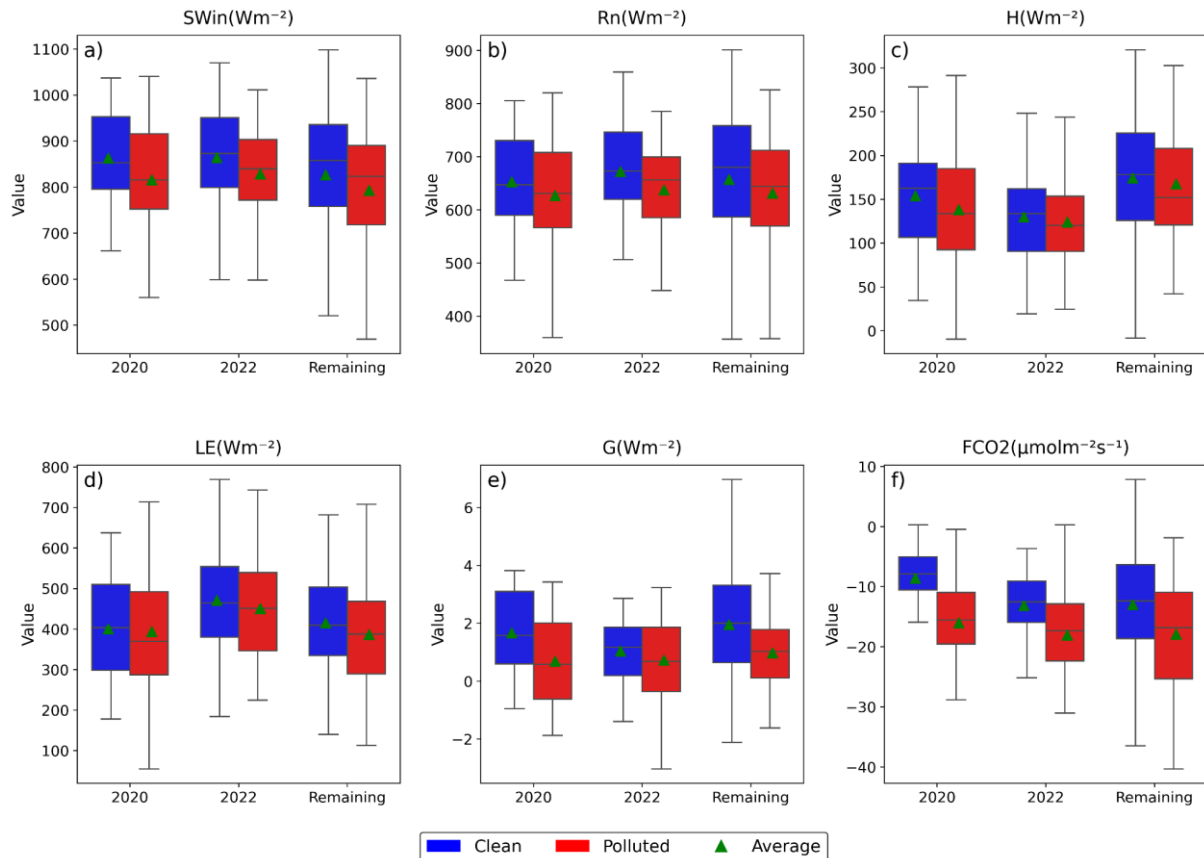

Figure R3. Box plots of a) incoming shortwave radiation (SWin), b) net radiation (Rn), c) sensible heat flux (H), d) latent heat flux (LE), e) ground heat flux (G), f) CO<sub>2</sub> flux (FCO<sub>2</sub>). All variables under clean (blue) and polluted (red) aerosol regimes for 2020, 2022, and the remaining years (2016, 2017, 2018, 2019 and 2021), grouped due to limited data availability. Triangles indicate the mean value.

Line 94-97. Only 523 valid half-hour periods (370 dry season, 153 wet) are quite small relative to the six-year period. The statistical representativeness and interannual variability need further discussion.

We modified our methodology to obtain as much data as possible, as detailed in lines L36-50 and Table R1 of this document.

Line 173-174. The section on radiative fluxes should include a graph of the full diurnal cycle of SW, LW, and Rn to visually demonstrate the 10:00 - 14:00 LT maximum. This would strengthen the rationale for focusing on that time window.

We thank Reviewer #1 for this valuable comment. As recommended, we have included Figure R4 in Section 3.2 of the manuscript (Figure 4 in the new version of the manuscript), which shows the full diurnal cycles of shortwave (SW), longwave (LW), and net radiation (Rn), and highlights the maximum between 10:00 and 14:00 LT.

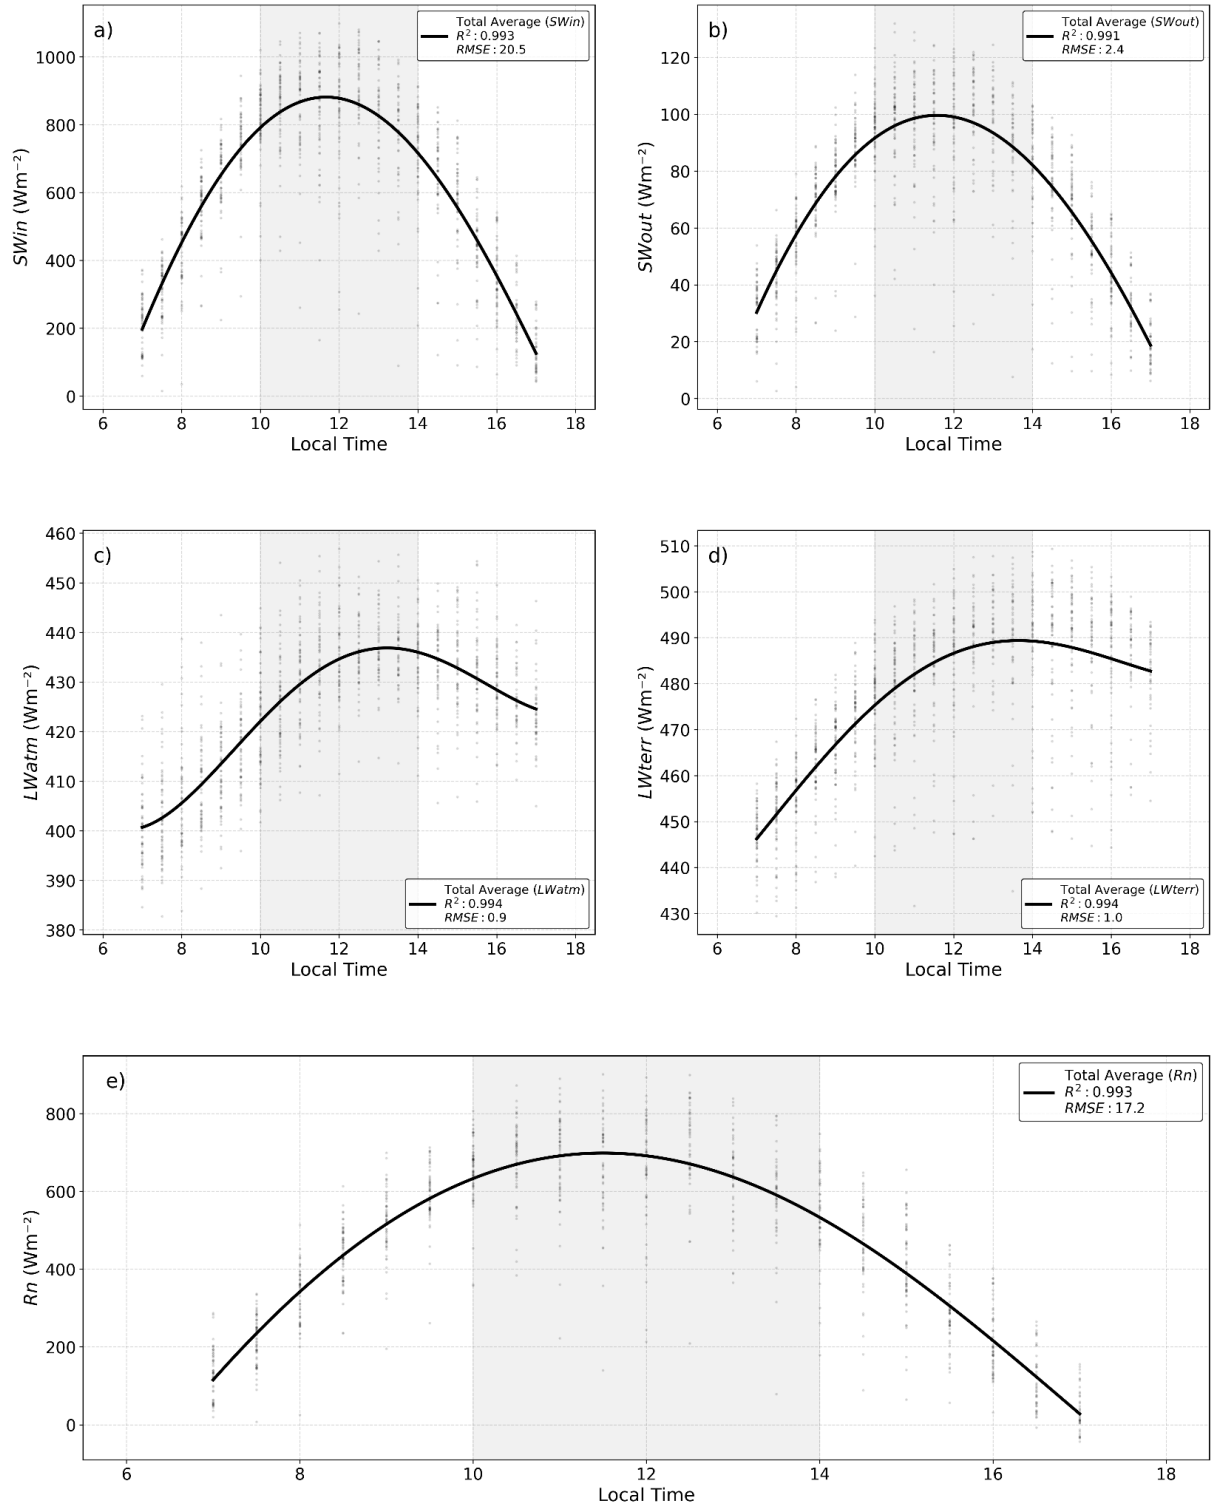

Figure R4. Diurnal cycles of radiative fluxes during the dry season from 2016 to 2022: (a) incoming ( $\text{SWin}$ ) and (b) outgoing ( $\text{SWout}$ ) shortwave radiation, (c) incoming atmospheric ( $\text{LWatm}$ ) and (d) outgoing terrestrial ( $\text{LWterr}$ ) longwave radiation, and (e) net radiation ( $\text{Rn}$ ). Markers indicate observed data, and solid lines represent fourth-order polynomial fits, with the corresponding  $R^2$  and RMSE.

In the revised version of the manuscript, we have added Figure R4 and the following paragraph to clarify the choice of the analysis period:



L209-212 : “As described in Section 2.3, the comparisons between Clean and Polluted regimes were restricted to the 10:00–14:00 LT period, corresponding to the maximum net radiation. The full diurnal cycles of shortwave, longwave, and net radiation during the dry season (2016–2022) show that the maximum values occur between 10:00 and 14:00 LT (Figure 4), supporting the choice of this time window for the subsequent analyses.”

Line 203-204. The physical interpretation of the longwave radiation components (LW<sub>atm</sub> and LW<sub>terr</sub>) is interesting, but it would benefit from quantitative support - for instance, by including a vertical temperature profile or an estimate of surface and atmospheric emissivity.

We used the Stefan–Boltzmann equation:  $LW = \epsilon \sigma T^4$ , where LW is the longwave radiation ( $Wm^{-2}$ ),  $\epsilon$  is the emissivity,  $\sigma$  is the Stefan–Boltzmann constant ( $5.67 \times 10^{-8} Wm^{-2}K^{-4}$ ) e T is the absolute temperature (K).

Using this relationship, separately for the Clean and Polluted regimes, we estimated the surface emissivity ( $\epsilon_s$ ) from the measured outgoing longwave radiation (LW<sub>terr</sub>) and the infrared surface temperature ( $T_s$ ), and the atmospheric emissivity ( $\epsilon_a$ ) from the measured incoming longwave radiation (LW<sub>atm</sub>) and air temperature ( $T_a$ ). The resulting emissivity values are shown in Table 3. The emissivities exhibit very similar values under both regimes, suggesting that the differences in aerosol conditions were not sufficient to affect the surface emissivity or the atmospheric emissivity.

Table R3: Mean values of incoming and outgoing longwave radiation (LW<sub>atm</sub> and LW<sub>terr</sub>), air temperature ( $T_a$ ), surface infrared temperature ( $T_s$ ), and the corresponding atmospheric ( $\epsilon_a$ ) and surface ( $\epsilon_s$ ) emissivities, under Clean and Polluted regimes for the 10:00 and 14:00 LT interval.

|          | LW <sub>atm</sub><br>( $Wm^{-2}$ ) | LW <sub>terr</sub><br>( $Wm^{-2}$ ) | $T_a$<br>(°C) | $T_s$<br>(°C) | $\epsilon_a$ | $\epsilon_s$ |
|----------|------------------------------------|-------------------------------------|---------------|---------------|--------------|--------------|
| Clean    | 431.5                              | 484.74                              | 30.3          | 32.6          | 0.898        | 0.978        |
| Polluted | 432.1                              | 483.60                              | 30.0          | 31.7          | 0.902        | 0.988        |

Line 227-232. The manuscript would benefit from a discussion of the energy balance closure, specifically addressing the discrepancy between R<sub>n</sub> and the sum of H, LE, and G. Reporting the residuals for both clean and polluted regimes would provide a clearer evaluation of data quality and potential systematic biases.

We thank the reviewer for this important comment. Following this suggestion, we updated the manuscript by adding the following text:

L278-281: “The surface energy balance closure was 0.89 for the Clean regime and 0.88 for the Polluted regime, comparable to values reported in the literature (Mauder et al., 2024). The corresponding residuals were of similar magnitude (70  $Wm^{-2}$  for Clean and 75  $Wm^{-2}$  for Polluted), indicating that the observed differences in energy fluxes are not related to differences in energy balance closure.”

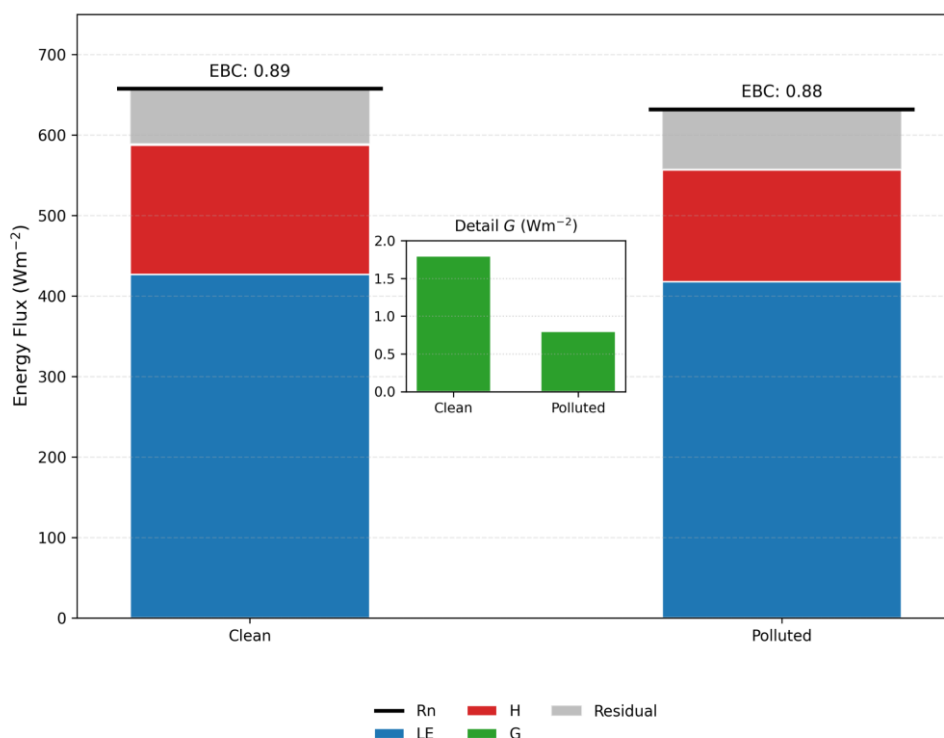

Figura R5. Energy balance closure for Clean and Polluted regimes during the dry season from 2016 to 2022, considering the 10:00–14:00 local time.

Figure 6. The fourth-order polynomial fits to the diurnal cycles provide a useful visual comparison, but the authors should complement them with statistical analyses to confirm that the apparent differences between regimes are statistically significant.

We thank the reviewer for this comment. The statistical analyses comparing Clean and Polluted aerosol regimes were performed for all analyzed variables, including those shown in Figure 6. The results are presented in Table R1, as requested in the General Comments.

Line 250-255. The connection between aerosol effects and water-use efficiency (WUE) is largely speculative because WUE is not quantitatively evaluated in the manuscript. The authors should consider calculating WUE (for example, as  $GPP/ET$  using  $FCO_2$  and LE data) or presenting an appropriate proxy to substantiate this aspect of the discussion.

We thank the reviewer for this important comment. Following this suggestion, we now quantify water-use efficiency (WUE) using  $|FCO_2| / LE$  as a proxy, and performed statistical analyses comparing Clean and Polluted aerosol regimes (Table R4).

Table R4: Mean water-use efficiency (WUE) calculated as  $|FCO_2| / LE$  ( $\mu mol J^{-1}$ ), under polluted and clean regimes for individual years (2020 and 2022), the remaining years (2016, 2017, 2018, 2019 and 2021) and all years combined.

| Year      | AOD Regime | FCO <sub>2</sub>   / LE (μmolJ <sup>-1</sup> ) |
|-----------|------------|------------------------------------------------|
| 2020      | Clean      | 0.022                                          |
| 2020      | Polluted   | 0.042                                          |
| 2022      | Clean      | 0.031                                          |
| 2022      | Polluted   | 0.044                                          |
| Remaining | Clean      | 0.026                                          |
| Remaining | Polluted   | 0.049                                          |
| All Years | Clean      | 0.029                                          |
| All Years | Polluted   | 0.042                                          |

In the new version of the Manuscript we added the follow sentence:

L304-307: *“In this study, WUE was estimated using FCO<sub>2</sub>/LE as a proxy. WUE was significantly higher under Polluted compared to Clean regime(mean values of 0.042 and 0.029, respectively,  $p < 0.05$ ). This indicates that under Polluted regime, vegetation assimilates more carbon per unit of water lost, consistent with the observed reduction in latent heat flux (Figure 6) despite enhanced CO<sub>2</sub> uptake (Figure 7).”*

Line 242-245. It seems to me that there is some inconsistency throughout the manuscript regarding the sign convention of CO<sub>2</sub> flux. The authors should clearly state that CO<sub>2</sub> uptake by the ecosystem corresponds to a negative flux, while positive flux values indicate a CO<sub>2</sub> emission to the atmosphere. Accordingly, a “drop” or decrease in FCO<sub>2</sub> should represent reduced carbon uptake, not enhanced assimilation. In the Abstract, for example, Authors should clarify the meaning of “decrease in CO<sub>2</sub> fluxes by 58%” (does this mean more negative flux, i.e., greater uptake?). Clarifying this point is essential for avoiding misinterpretation of the results and ensuring consistency across figures, tables, and the discussion.

We thank the reviewer for pointing out this important issue. To avoid any ambiguity, we have clarified throughout the manuscript that negative CO<sub>2</sub> fluxes indicate net ecosystem uptake. The text has been revised as follows:

L290-292: *“In addition to their effect on energy fluxes, aerosols were found to have a significant influence on the CO<sub>2</sub> flux, becoming more negative by an average of 4.9 μmol m<sup>-2</sup>s<sup>-1</sup> (39.5 %) in the polluted regime compared to clean conditions between 10:00 and 14:00 LT.”*

Abstract: *“We find that enhanced aerosol presence reduces both sensible heat flux and energy available for evapotranspiration by approximately 13.5 % and 2.1% respectively, while increasing CO<sub>2</sub> uptake (i.e., CO<sub>2</sub> flux becoming more negative) by about 39.5 %.”*

The figures are generally clear and well designed, but they would benefit from the inclusion of confidence intervals or error bars to convey the statistical variability of the data. Adding uncertainty information would allow readers to better assess the robustness of the observed differences between regimes and the reliability of the fitted curves.

We thank the reviewer for this suggestion. Figures 4, 5, and 6 (Fig. 5, 6, 7 in the new version of the manuscript) have been revised to include the observed data points underlying the averaged curves, allowing a direct visualization of the data variability.

### Minor comments

All physical variables ( $R_n$ ,  $H$ ,  $LE$ ,  $FCO_2$ ,  $AOD$ , etc.) should be written in italics or formatted with the equation editor for consistency and readability.

The entire manuscript was revised to ensure consistent formatting of all physical variables. Thanks.

Throughout the manuscript, several acronyms are not explicitly defined ( $ARF_{24h}$ ,  $LW_{terr}$ ), which may affect readability. I recommend defining each acronym upon first use.

The entire manuscript was revised to ensure that all acronyms are explicitly defined at their first occurrence. Thanks.

Line 191. " $ARF_{24h}$ ", did Authors refer to daily mean? It should be clarified

Yes, in the revised manuscript, we have removed the term  $ARF_{24h}$  to avoid ambiguity as follows:

L227-230: "*Consistent with these findings, Palacios et al. (2022) estimated an average ARF of  $-20.77 \pm 5.04 \text{ Wm}^{-2}$  for the dry season in the central Amazon. Procopio et al. (2004) found daily ARF values ranging from  $-21$  to  $-74 \text{ Wm}^{-2}$  in the deforestation arc, an area with higher levels of pollution than the central Amazon. Rizzo et al. (2011) investigated this central region and reported a daily ARF value of  $-32 \text{ Wm}^{-2}$ .*"

Line 187-188. The phrase "In contrast" seems used incorrectly; the studies cited do not contradict one another, showing similar ARF values (within the estimated errors). The Authors should revise wording.

We thank the reviewer for this comment. The term "*In contrast*" was replaced by "*Consistent with these findings*" as detailed in previous comment (L352-356 in this document).

Table3. Caption.  $FCO$  should be replaced by  $FCO_2$

The caption of Table 3 has been revised.

Line 299. As before,  $CO$  ->  $CO_2$

The text has been updated accordingly.

### References

378 Aguilos, M., Stahl, C., Burban, B., Hérault, B., Courtois, E., Coste, S., Wagner, F.,  
379 Ziegler, C., Takagi, K., and Bonal, D.: Inter-annual and Seasonal Variations in  
380 Ecosystem Transpiration and Water Use Efficiency in a Tropical Rainforest, *Forests*,  
381 10, 14, <https://doi.org/10.3390/f10010014>, 2018.

382 Botía, S., Komiya, S., Marshall, J., Koch, T., Gałkowski, M., Lavric, J., Gomes-Alves,  
383 E., Walter, D., Fisch, G., Pinho, D. M., Nelson, B. W., Martins, G., Lujckx, I. T., Koren,  
384 G., Florentie, L., Carioca de Araújo, A., Sá, M., Andreae, M. O., Heimann, M., Peters,  
385 W., and Gerbig, C.: The CO<sub>2</sub> record at the Amazon Tall Tower Observatory: A new  
386 opportunity to study processes on seasonal and inter-annual scales, *Global Change*  
387 *Biology*, 28, 588–611, <https://doi.org/10.1111/gcb.15905>, 2021.

388 Braghieri, R. K., Yamasoe, M. A., Évora do Rosário, N. M., Ribeiro da Rocha, H., de  
389 Souza Nogueira, J., and de Araújo, A. C.: Characterization of the radiative impact of  
390 aerosols on CO<sub>2</sub> and energy fluxes in the Amazon deforestation arch using artificial  
391 neural networks, *Atmospheric Chemistry and Physics*, 20, 3439–3458,  
392 <https://doi.org/10.5194/acp-20-3439-2020>, 2020.

393 Cirino, G. G., Souza, R. A. F., Adams, D. K., and Artaxo, P.: The effect of atmospheric  
394 aerosol particles and clouds on net ecosystem exchange in the Amazon, *Atmospheric*  
395 *Chemistry and Physics*, 14, 6523–6543, <https://doi.org/10.5194/acp-14-6523-2014>,  
396 2014.

397 Deng, X., Zhang, J., Che, Y., Zhou, L., Lu, T., and Han, T.: The Effect of Diffuse  
398 Radiation on Ecosystem Carbon Fluxes Across China From FLUXNET Forest  
399 Observations, *Frontiers in Earth Science*, 10,  
400 <https://doi.org/10.3389/feart.2022.906408>, 2022.

401 Ezhova, E., Ylivinkka, I., Kuusk, J., Komsaare, K., Vana, M., Krasnova, A., Noe, S.,  
402 Arshinov, M., Belan, B., Park, S. B., Lavric, J. V., Heimann, M., Petäjä, T., Vesala, T.,  
403 Mammarella, I., Kolari, P., Bäck, J., Rannik, U., Kerminen, V. M., and Kulmala, M.:  
404 Direct effect of aerosols on solar radiation and gross primary production in boreal and  
405 hemiboreal forests, *Atmospheric Chemistry and Physics*, 18, 17 863–17 881,  
406 <https://doi.org/10.5194/acp-18-17863-2018>, 2018.

407 Giorgi, F., Bi, X., and Qian, Y.: Direct radiative forcing and regional climatic effects of  
408 anthropogenic aerosols over East Asia: A regional coupled climate-chemistry/aerosol  
409 model study, *Journal of Geophysical Research Atmospheres*, 107, AAC 7–1–AAC 7–  
410 18,425 <https://doi.org/10.1029/2001JD001066>, 2002.

411 Mercado, L. M., Bellouin, N., Sitch, S., Boucher, O., Huntingford, C., Wild, M., and Cox,  
412 P. M.: Impact of changes in diffuse radiation on the global land carbon sink, *Nature*,  
413 458, 1014–1017, <https://doi.org/10.1038/nature07949>, 2009.

414 Palácios, R. d. S., Artaxo, P., Cirino, G. G., Nakale, V., Morais, F. G., Rothmund, L.  
415 D., Biudes, M. S., Machado, N. G., Curado, L. F. A., Marques, J. B., and Nogueira, J.  
416 d. S.: Long-term measurements of aerosol optical properties and radiative forcing  
417 (2011–2017) over Central Amazonia, *Atmósfera*, 35, 143–163,  
418 <https://doi.org/10.20937/atm.52892>, 2022.

- 419 Procopio, A. S., Artaxo, P., Kaufman, Y. J., Remer, L. A., Schafer, J. S., and Holben,  
420 B. N.: Multiyear analysis of amazonian biomass burning smoke radiative forcing of  
421 climate, *Geophysical Research Letters*, 31, <https://doi.org/10.1029/2003gl018646>,  
422 2004.
- 423 Rizzo, L. V., Correia, A. L., Artaxo, P., Procópio, A. S., and Andreae, M. O.: Spectral  
424 dependence of aerosol light absorption over the Amazon Basin, *Atmospheric*  
425 *Chemistry and Physics*, 11, 8899–8912, <https://doi.org/10.5194/acp-11-8899-2011>,  
426 2011.
- 427 Seinfeld, J. H. and Pandis, S. N.: *Atmospheric chemistry and physics: from air pollution*  
428 *to climate change.*, John Wiley Sons, 3rd edn., 2016.
